# Supplementary material for: Sodium storage in fluorine-rich mesoporous carbon fabricated by low-temperature carbonization of polyvinylidene fluoride with a silica template
Source: Royal Society of Chemistry journal article supplement (doi:10.1039/c6ra24386j), 2016-01-01
Supplement: c6ra24386j1.pdf [file c6ra24386j1.pdf]

## *Supporting Information*

### **Sodium storage in fluorine-rich mesoporous carbon fabricated by low-temperature carbonization of polyvinylidene fluoride with silica template**

Yongzhi Zhang, Li Chen, Yan Meng, Xiaopeng Li, Yong Guo\* and Dan Xiao\*

**Table S1.** The F contents of PVDF derived mesoporous carbons carbonized at 500, 600 and 700 °C measured by XPS and XRF.

| Carbonization temperature /<br>°C | F contents  |           |
|-----------------------------------|-------------|-----------|
|                                   | XPS (at. %) | XRF (wt%) |
| 500                               | 8.35        | 9.26      |
| 600                               | 2.17        | 3.02      |
| 700                               | 0.48        | 0.57      |

**Table S2** Peak assignment of C 1s for re-FMC

| Peak | Binding energy (eV) | Assignment              | Fraction of species (%) |
|------|---------------------|-------------------------|-------------------------|
| C1s  | 284.8               | C1: sp <sup>2</sup> C-C | 81.8                    |
|      | 285.7               | C2: C-O-C/C-OH          | 6.9                     |
|      | 287.1               | C3: C=O                 | 6.0                     |
|      | 288.2               | C4: Semi-ionic C-F      | 3.1                     |
|      | 290.7               | C5: Covalent C-F        | 2.2                     |

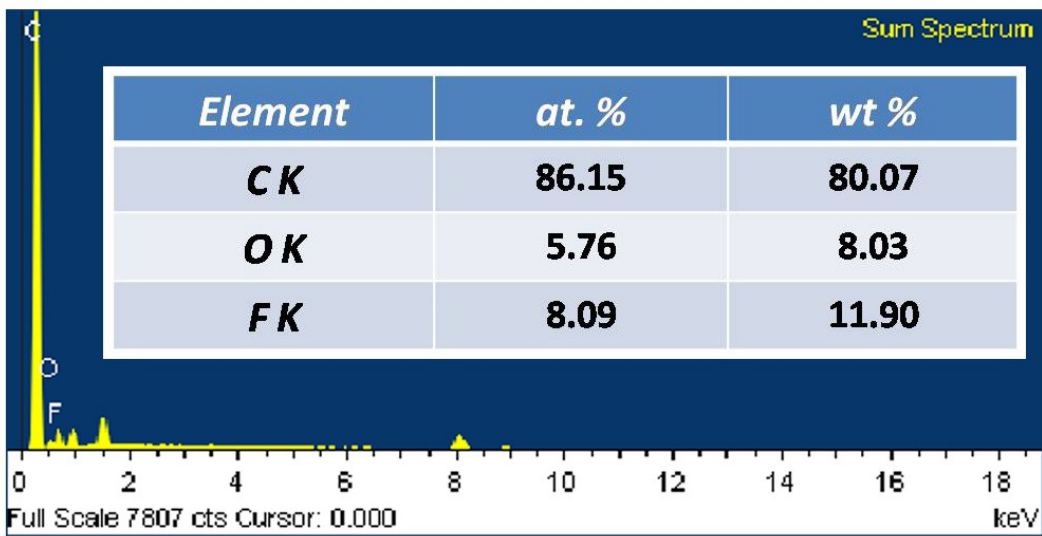

**Fig. S1** EDS of FMC, the table (inset) displays the relative content of carbon, oxygen and fluorine.

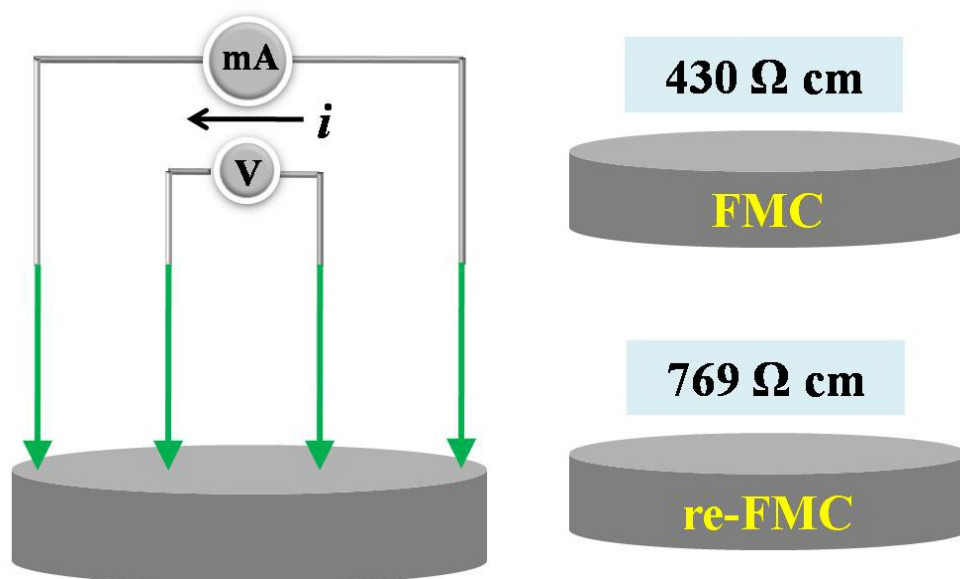

**Fig. S2** Schematic diagram of bulk conductivity of FMC and re-FMC measured by four point probe

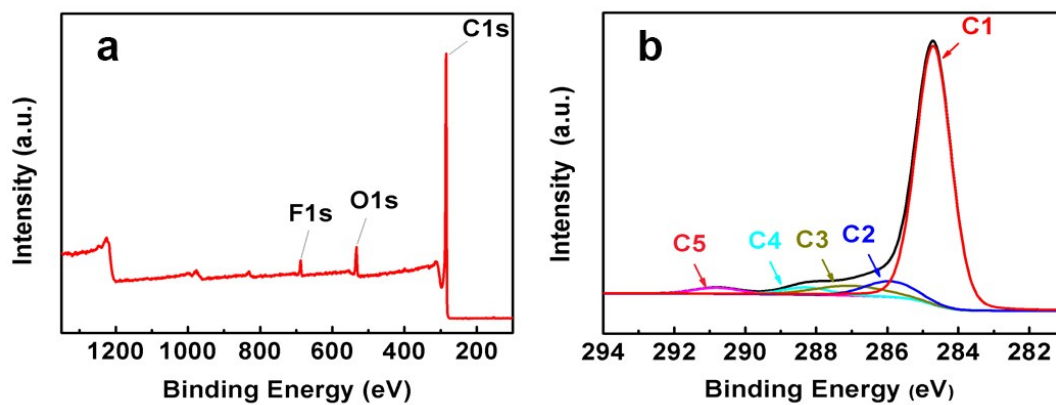

**Fig. S3** The total XPS spectrum (a) and the C 1s (b) of re-FMC.

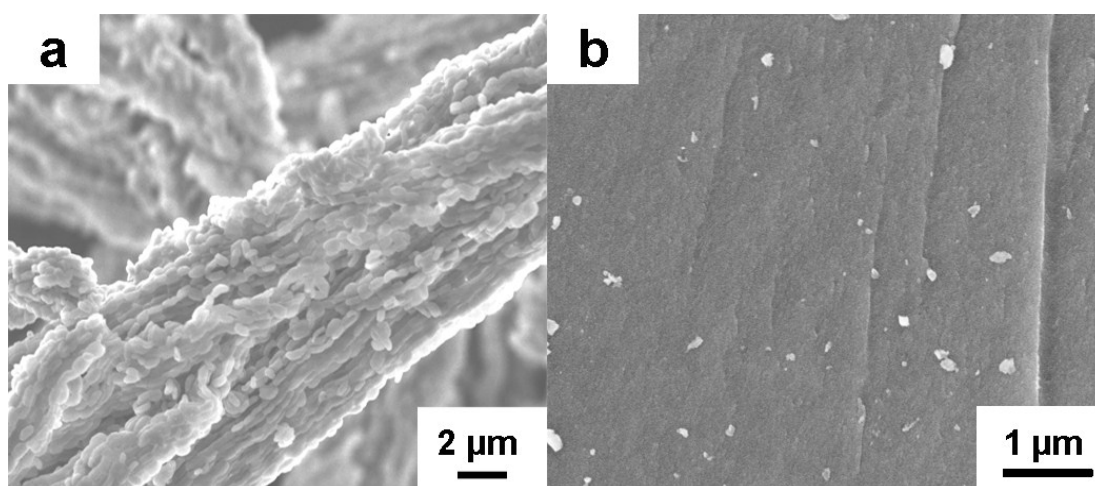

**Fig. S4** SEM images of SBA-15 template (a) and PVDF derived carbon carbonized without template at 500 °C (b).

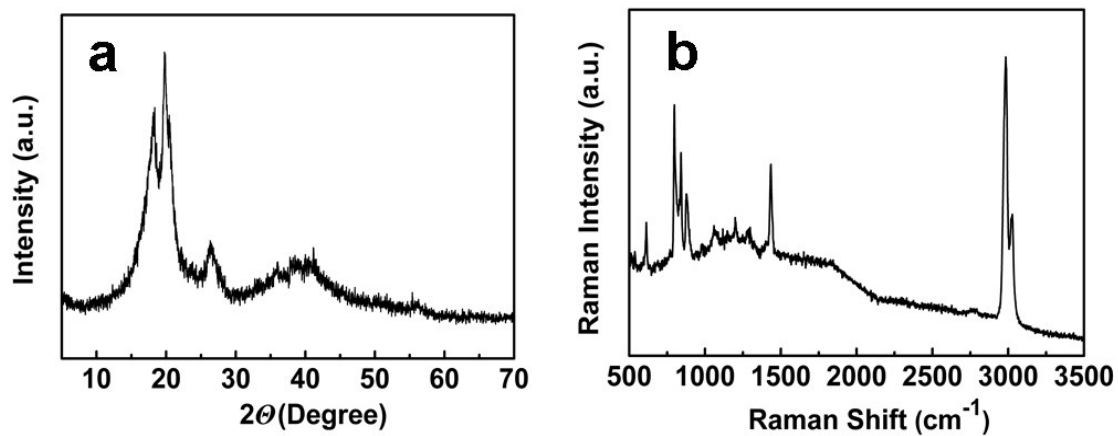

Fig. S5 XRD spectrum (a) and Raman spectrum (b) of PVDF.
